# Supplementary material
Source: MDPI journal article supplement (https://www.mdpi.com/2304-6740/10/12/261)
Supplement: s1 [file s1]

# Polymeric copper(II) complexes with a newly synthesized biphenyldicarboxylic acid Schiff base ligand – synthesis, structural and thermal characterization

Milica G. Bogdanović<sup>1</sup>, Nikola D. Radnović, Berta Barta Hollo<sup>1,\*</sup>, Mirjana M. Radanović<sup>1</sup>, Branko B. Kordić<sup>1</sup>, Vidak N. Raičević<sup>1</sup>, Ljiljana S. Vojinović-Ješić<sup>1</sup>, and Marko V. Rodić<sup>1</sup>

<sup>1</sup> Faculty of Sciences, University of Novi Sad, Trg Dositeja Obradovića 3, 21000 Novi Sad, Serbia

\* Correspondence: berta.hollo@dh.uns.ac.rs

## Table of content:

|                                                |                                   |
|------------------------------------------------|-----------------------------------|
| 1. Preparation of the III and IV               | Scheme S1                         |
| 2. FTIR Spectra of IV and desolvated form of 2 | Figure S1 and S2                  |
| 3. NMR Spectra of IV and H <sub>4</sub> L      | Figures S3–S6                     |
| 4. Single Crystal Data                         | Tables S1–S4<br>Figures S7 and S8 |

## 1. Preparation of III and IV

### III

Dimethyl-2,2'-dinitro-[1,1'-biphenyl]-4,4'-dicarboxylate (**II**) (0.5 g, 1.39 mmol) dissolved in THF (28 mL) was added to a mixture of 1 % Pd/C catalyst (109.9 mg) in chilled MeOH (14.4 mL). Ammonium formate (799.8 mg, 12.68 mmol) was added portion-wise and the mixture was heated at 60 °C for 2 h. After cooling to room temperature, the Pd/C was removed by filtration and MeOH and THF were removed by rotary evaporation. The resulting precipitate was taken up in EtOAc (25 mL), then washed with H<sub>2</sub>O (3 × 25 mL), brine and dried over anhydrous Na<sub>2</sub>SO<sub>4</sub>. After removing the solvent by rotary evaporation the crude product was recrystallized from EtOH. Yield 358 mg, 86%.  $\nu_{\text{max}}/\text{cm}^{-1}$  (ATR): 3449 w, 3358 m, 3232 w, 3065 w, 2999 w, 2949 w, 2846 w, 2100 w, 1784 w, 1696 s, 1614 m, 1564 m, 1515 w, 1495 w, 1436 m, 1418 s, 1373 w, 1297 s, 1280 m, 1233 s, 1195 s, 1158 m, 1112 s, 1045 m, 999 m, 986 m, 893 m, 829 w, 795 m, 762 s, 750 s, 731 s, 669 m, 584 m, 555 s, 523 s, 487 m, 453 s, 425 s, 406 m, 402 m.

### IV

A mixture of dimethyl 2,2'-diamino-[1,1'-biphenyl]-4,4'-dicarboxylate (**III**) (350 mg, 1.17 mmol) in THF (11.7 mL) and aq. 1 M KOH (4 mL) was heated for reflux for 16 hours. After cooling to room temperature the THF was removed by rotary evaporation and the solution was acidified with 1M HCl. The resulting yellow precipitate was separated by filtration washed with water then methanol and air-dried. Yield 286 mg, 90%. <sup>1</sup>H NMR (400 MHz, DMSO-*d*<sub>6</sub>) 12.68 (br s, 2H, H5), 7.43 (d, *J* = 1.7 Hz, 2H, H3), 7.23 (dd, *J* = 9.5 Hz, 2H, H2), 7.06 (d, *J* = 7.8 Hz, 2H, H1), 4.94 (br s, 4H, H4).  $\nu_{\text{max}}/\text{cm}^{-1}$  (ATR): 3421 w, 3359 w, 2798 w, 2527 w, 2285 w, 1687 m, 1615 w, 1547 m, 1506 m, 1412 m, 1389 w, 1302 m, 1281 m, 1264 m, 1228 s, 1139 w, 1113 w, 920 m, 882 m, 837 m, 786 s, 764 s, 754 s, 715 m, 660 s, 610 m, 579 m, 554 s, 458 s, 430 s.

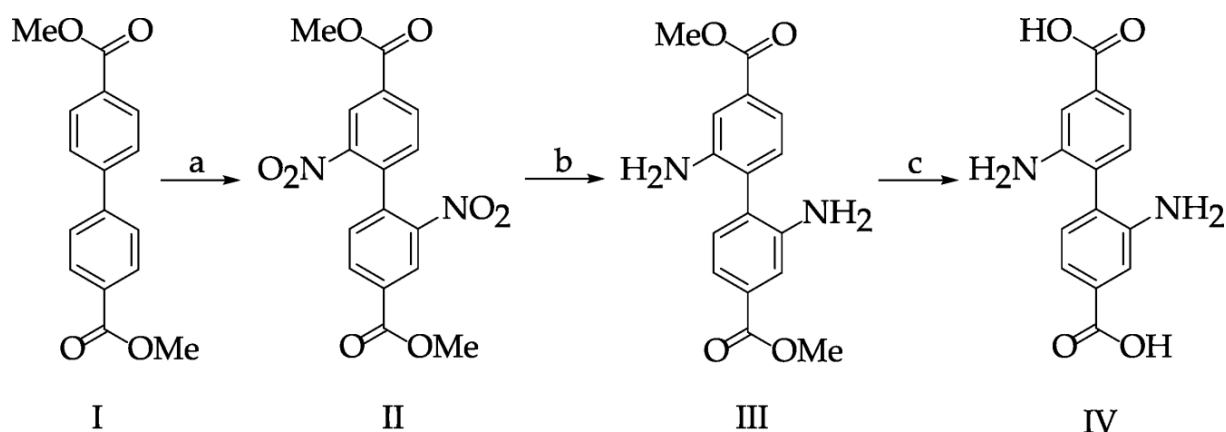

**Scheme S1.** Synthesis of IV. Reagents and conditions: (a) cc  $\text{H}_2\text{SO}_4$ , 65%  $\text{HNO}_3$  (2 eq), 15–20 °C, 1 h; (b) Pd/C, MeOH, THF, 60 °C, 2 h (c) 1 M KOH, THF/ $\text{H}_2\text{O}$ , reflux, 16 h, then 1M HCl.

## 2. FTIR Spectra of IV and desolvated form of 2

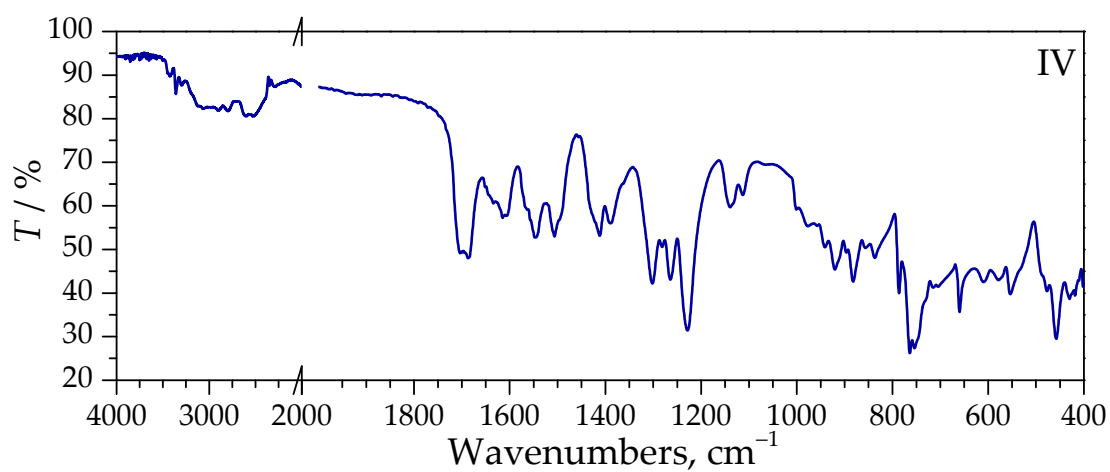

**Figure S1.** FTIR spectrum of IV.

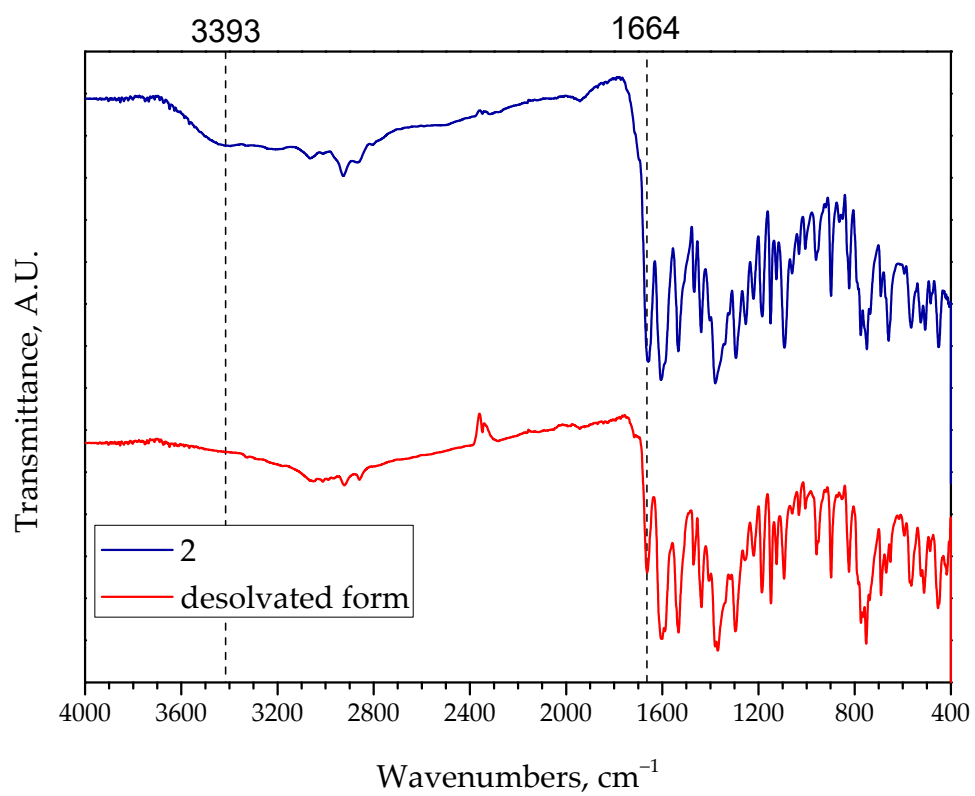

**Figure S2.** FTIR spectra of **2** and its desolvated form.

### 3. NMR Spectra of IV and H<sub>4</sub>L

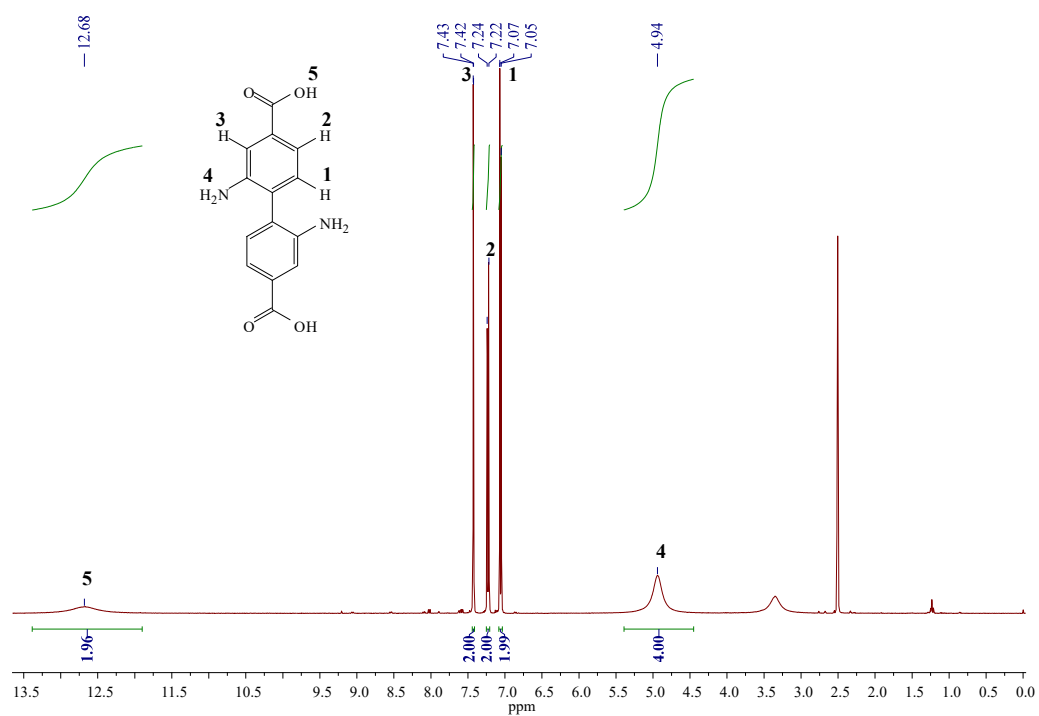

Figure S3. <sup>1</sup>H NMR spectrum (400 MHz, DMSO-*d*<sub>6</sub>) of IV

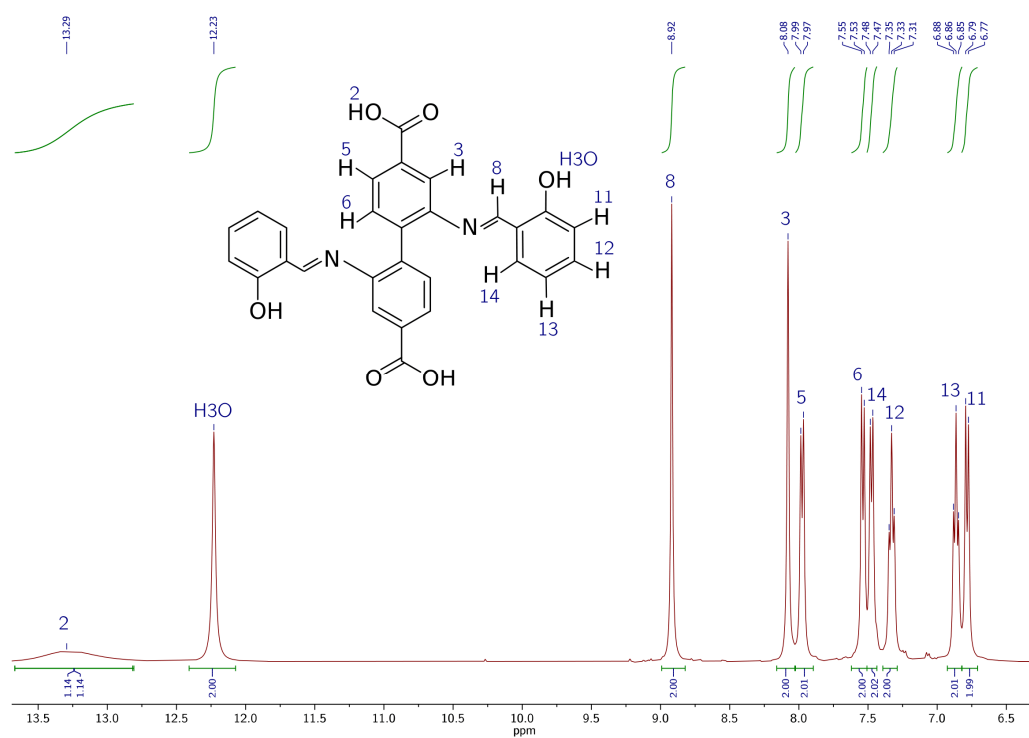

Figure S4. <sup>1</sup>H NMR spectrum (400 MHz, DMSO-*d*<sub>6</sub>) of H<sub>4</sub>L.

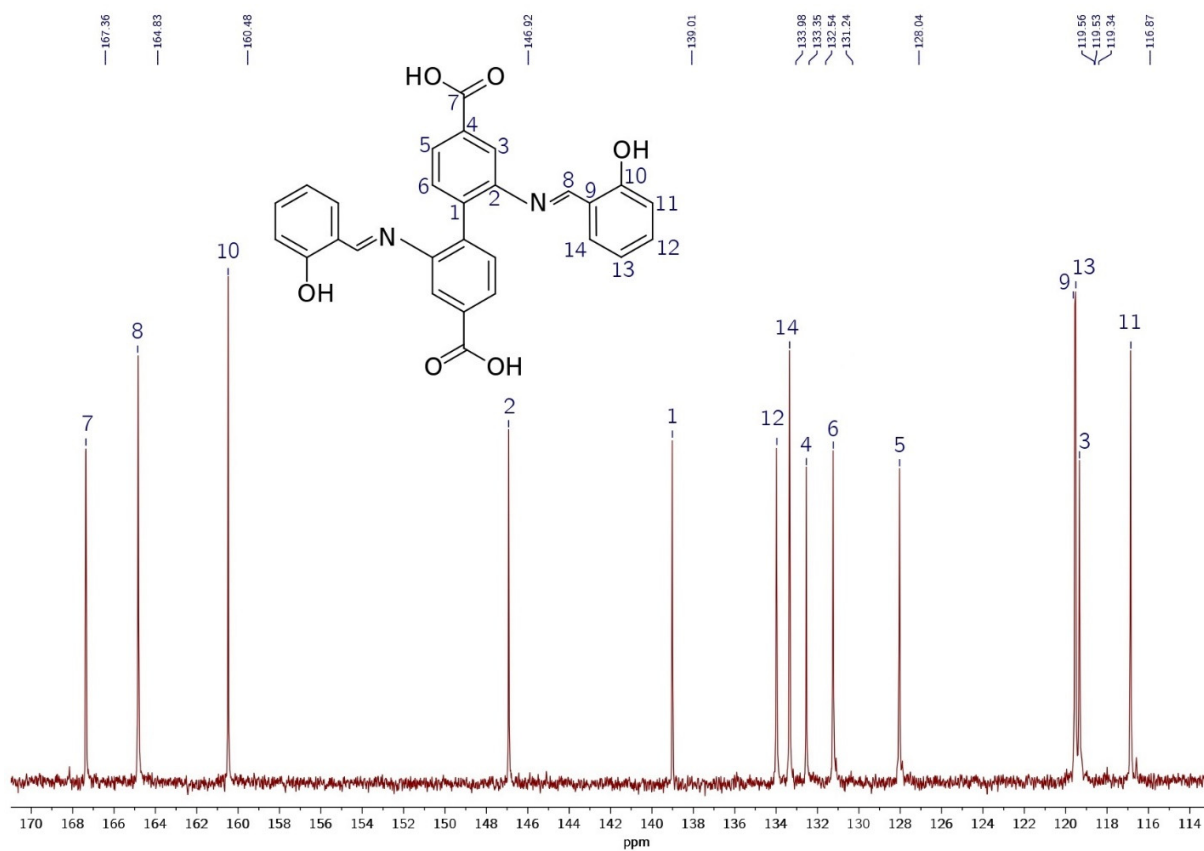

**Figure S5.** <sup>13</sup>C NMR spectrum (101 MHz, DMSO-*d*<sub>6</sub>) of **H<sub>4</sub>L**.

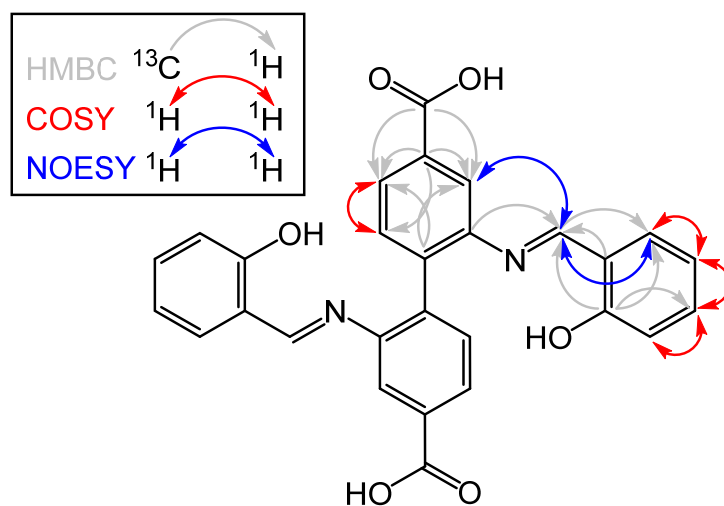

**Figure S6.** Relevant HMBC (in gray), COSY (in red), and NOESY (in blue) correlations of **H<sub>4</sub>L**.

## 4. Single Crystal Data

**Table S1.** Crystallographic and refinement details.

|                                                                 | <b>H4L·3DMF</b>                                                                                    | <b>1</b>                                                                      | <b>2</b>                                                                                          |
|-----------------------------------------------------------------|----------------------------------------------------------------------------------------------------|-------------------------------------------------------------------------------|---------------------------------------------------------------------------------------------------|
| <i>Crystal data</i>                                             |                                                                                                    |                                                                               |                                                                                                   |
| Chemical formula                                                | C <sub>28</sub> H <sub>20</sub> N <sub>2</sub> O <sub>6</sub> ·3(C <sub>3</sub> H <sub>7</sub> NO) | C <sub>28</sub> H <sub>18</sub> CuN <sub>2</sub> O <sub>6</sub><br>[+solvent] | C <sub>28</sub> H <sub>18</sub> CuN <sub>2</sub> O <sub>6</sub> ·C <sub>3</sub> H <sub>7</sub> NO |
| <i>M<sub>r</sub></i>                                            | 699.75                                                                                             | 541.98                                                                        | 615.08                                                                                            |
| Crystal system                                                  | Triclinic                                                                                          | Monoclinic                                                                    | Monoclinic                                                                                        |
| Space group                                                     | <i>P</i> −1                                                                                        | <i>P</i> 2 <sub>1</sub> / <i>c</i>                                            | <i>P</i> 2 <sub>1</sub> / <i>c</i>                                                                |
| <i>a</i> / Å                                                    | 10.6732 (2)                                                                                        | 9.8123 (16)                                                                   | 15.4534 (5)                                                                                       |
| <i>b</i> / Å                                                    | 12.9669 (4)                                                                                        | 16.0633 (19)                                                                  | 9.8628 (3)                                                                                        |
| <i>c</i> / Å                                                    | 14.7722 (4)                                                                                        | 17.156 (3)                                                                    | 19.2122 (8)                                                                                       |
| $\alpha$ / °                                                    | 70.686 (3)                                                                                         | 90                                                                            | 90                                                                                                |
| $\beta$ / °                                                     | 85.775 (2)                                                                                         | 98.827 (16)                                                                   | 109.527 (4)                                                                                       |
| $\gamma$ / °                                                    | 73.868 (2)                                                                                         | 90                                                                            | 90                                                                                                |
| <i>V</i> / Å <sup>3</sup>                                       | 1853.04 (9)                                                                                        | 2672.1 (7)                                                                    | 2759.79 (18)                                                                                      |
| <i>Z</i>                                                        | 2                                                                                                  | 4                                                                             | 4                                                                                                 |
| Radiation type                                                  | Cu <i>K</i> α                                                                                      | Mo <i>K</i> α                                                                 | Mo <i>K</i> α                                                                                     |
| $\mu$ / mm <sup>−1</sup>                                        | 0.75                                                                                               | 0.86                                                                          | 0.85                                                                                              |
| Crystal size, mm                                                | 0.94 × 0.55 × 0.28                                                                                 | 0.35 × 0.12 × 0.08                                                            | 0.35 × 0.13 × 0.05                                                                                |
| <i>Data collection</i>                                          |                                                                                                    |                                                                               |                                                                                                   |
| Absorption correction                                           | Analytical                                                                                         | Analytical                                                                    | Analytical                                                                                        |
| <i>T</i> <sub>min</sub>                                         | 0.624                                                                                              | 0.829                                                                         | 0.946                                                                                             |
| <i>T</i> <sub>max</sub>                                         | 0.835                                                                                              | 0.933                                                                         | 0.991                                                                                             |
| Measured reflections                                            | 40554                                                                                              | 17613                                                                         | 27320                                                                                             |
| Independent reflections                                         | 7204                                                                                               | 5474                                                                          | 5643                                                                                              |
| Observed reflections [ <i>I</i> > 2σ( <i>I</i> )]               | 5933                                                                                               | 2417                                                                          | 3572                                                                                              |
| <i>R</i> <sub>int</sub>                                         | 0.029                                                                                              | 0.126                                                                         | 0.076                                                                                             |
| (sin $\theta$ / λ) <sub>max</sub> / Å <sup>−1</sup>             | 0.617                                                                                              | 0.628                                                                         | 0.625                                                                                             |
| <i>Refinement</i>                                               |                                                                                                    |                                                                               |                                                                                                   |
| <i>R</i> [ <i>F</i> <sup>2</sup> > 2σ( <i>F</i> <sup>2</sup> )] | 0.074                                                                                              | 0.087                                                                         | 0.065                                                                                             |
| <i>wR</i> [ <i>F</i> <sup>2</sup> ]                             | 0.258                                                                                              | 0.242                                                                         | 0.193                                                                                             |
| <i>S</i>                                                        | 1.09                                                                                               | 1.02                                                                          | 1.03                                                                                              |
| Reflections                                                     | 7204                                                                                               | 5474                                                                          | 5643                                                                                              |
| Parameters                                                      | 470                                                                                                | 337                                                                           | 383                                                                                               |
| H-atom treatment                                                | Mixed                                                                                              | Mixed                                                                         | Constrained                                                                                       |
| $\Delta\rho_{\text{max}}$ / e Å <sup>−3</sup>                   | 1.08                                                                                               | 0.44                                                                          | 1.86                                                                                              |
| $\Delta\rho_{\text{min}}$ / e Å <sup>−3</sup>                   | −0.38                                                                                              | −0.78                                                                         | −0.47                                                                                             |

**Table S2.** Selected dihedral angles of structures with 2,2'-bis(((*E*)-2-hydroxybenzylidene)amino)-[1,1'-biphenyl] fragment.

| CSD refcode | $\delta(\text{ph1-sal1}) / ^\circ$ | $\delta(\text{ph2-sal2}) / ^\circ$ | $\delta(\text{ph1-ph2}) / ^\circ$ |
|-------------|------------------------------------|------------------------------------|-----------------------------------|
| BAMWUI      | 38,4                               | 38,7                               | 73,7                              |
| DUYLOB      | 24,7                               | 25,2                               | 62,1                              |
| EYUROF      | 19,5                               | 26,6                               | 62,8                              |
| EYUROF      | 38,5                               | 46,7                               | 63,0                              |
| KEYGIH      | 35,2                               | 37,2                               | 56,3                              |
| KEYGON      | 6,8                                | 26,5                               | 71,3                              |
| KEYGUT      | 16,7                               | 16,9                               | 67,7                              |
| KEYHAA      | 35,9                               | 37,6                               | 56,1                              |
| LOCTOP      | 15,0                               | 15,2                               | 79,5                              |
| LOCTUV      | 10,4                               | 10,5                               | 79,3                              |
| LOCVAD      | 13,6                               | 14,3                               | 71,3                              |
| LOCVEH      | 12,2                               | 12,3                               | 70,7                              |
| QADDEH      | 33,9                               | 34,7                               | 89,4                              |
| QICPOH      | 24,8                               | 28,2                               | 73,6                              |
| RUVRIM      | 41,6                               | 41,7                               | 43,7                              |
| RUVRUY      | 14,0                               | 26,7                               | 65,5                              |
| TISGIL      | 34,6                               | 34,7                               | 89,0                              |

**Table S3.** Hydrogen bonding geometry parameters for complexes **1** and **2**.

| Bond                    |             | Distances (Å) |                       | Angles (°)              | Symmetry operation on A |
|-------------------------|-------------|---------------|-----------------------|-------------------------|-------------------------|
| <i>D</i> -H... <i>A</i> | <i>D</i> -H | H... <i>A</i> | <i>D</i> ... <i>A</i> | <i>D</i> -H... <i>A</i> |                         |
| <b>1</b>                |             |               |                       |                         |                         |
| O2-H2...O3              | 0.82        | 1.82          | 2.623(6)              | 166.9                   | $-x, y+1/2, -z+1/2$     |
| O2'-H2'...O3'           | 0.82        | 1.87          | 2.660(6)              | 159.9                   | $x+1, y, z$             |
| <b>2</b>                |             |               |                       |                         |                         |
| O2'-H2'...O4            | 0.82        | 1.85          | 2.642(8)              | 163.3                   |                         |
| O2-H2...O3              | 0.82        | 1.83          | 2.620(4)              | 161.9                   | $x, y-1, z$             |



**Table S4.** Structural parameters of  $\pi\cdots\pi$  and C–H $\cdots\pi$  interactions in the crystal structures of **1** and **2**

| Cg( <i>m</i> ) $\cdots$ Cg( <i>n</i> ) | <i>d</i> (Cg $\cdots$ Cg) / Å | $\alpha$ / °                 | $\beta$ / °                    | $\gamma$ / ° | Symmetry operation on Cg( <i>n</i> ) |
|----------------------------------------|-------------------------------|------------------------------|--------------------------------|--------------|--------------------------------------|
| <b>1</b>                               |                               |                              |                                |              |                                      |
| Cg(1) $\cdots$ Cg(1)                   | 3.820(5)                      | 0.0(4)                       | 25.1                           | 25.1         | $-x+1, -y, -z+1$                     |
| <b>2</b>                               |                               |                              |                                |              |                                      |
| Cg(2) $\cdots$ Cg(2)                   | 3.889(3)                      | 0.0(3)                       | 27.9                           | 27.9         | $-x, -y+1, -z+1$                     |
| C–H $\cdots$ Cg( <i>n</i> )            | <i>d</i> (C $\cdots$ Cg) / Å  | <i>d</i> (H $\cdots$ Cg) / Å | $\angle$ (C–H $\cdots$ Cg) / ° | $\delta$ / ° | Symmetry operation on Cg( <i>n</i> ) |
| <b>1</b>                               |                               |                              |                                |              |                                      |
| C8–H8 $\cdots$ Cg(1)                   | 3.730(8)                      | 2.86                         | 156                            | 17.89        | $x, -y+1/2, z-1/2$                   |
| C13–H13 $\cdots$ Cg(3)                 | 3.644(11)                     | 2.96                         | 132                            | 18.00        | $x, -y+1/2, z-1/2$                   |
| C13'–H13' $\cdots$ Cg(3)               | 3.554(11)                     | 2.95                         | 124                            | 10.83        | $x, -y+1/2, z+1/2$                   |
| <b>2</b>                               |                               |                              |                                |              |                                      |
| C12'–H12' $\cdots$ Cg(3)               | 3.514(6)                      | 2.78                         | 137                            | 12.49        | $x, -y+1/2, z-1/2$                   |
| C13–H13 $\cdots$ Cg(4)                 | 3.788(7)                      | 2.98                         | 146                            | 3.70         | $-x, -y+1, -z+1$                     |
| C17–H17A $\cdots$ Cg(2)                | 3.521(12)                     | 2.72                         | 141                            | 8.10         | $x+1, -y+3/2, z+1/2$                 |

Cg = geometric center of a ring;  $\alpha$  = dihedral angle between mean planes of rings *m* and *n*;  $\beta$  = angle between Cg(*m*) $\rightarrow$ Cg(*n*) vector and normal to mean plane of ring *m*;  $\gamma$  = angle between Cg(*m*) $\rightarrow$ Cg(*n*) vector and normal to mean plane of ring *n*;  $\delta$  = angle between Cg(*n*) $\rightarrow$ H vector and normal to mean plane of ring *n*. Ring numbering: (1) C9',C10',C11',C12',C13',C14'; (2) C9,C10,C11,C12,C13,C14; (3) C1,C2,C3,C4,C5,C6; (4) C1',C2',C3',C4',C5',C6'.

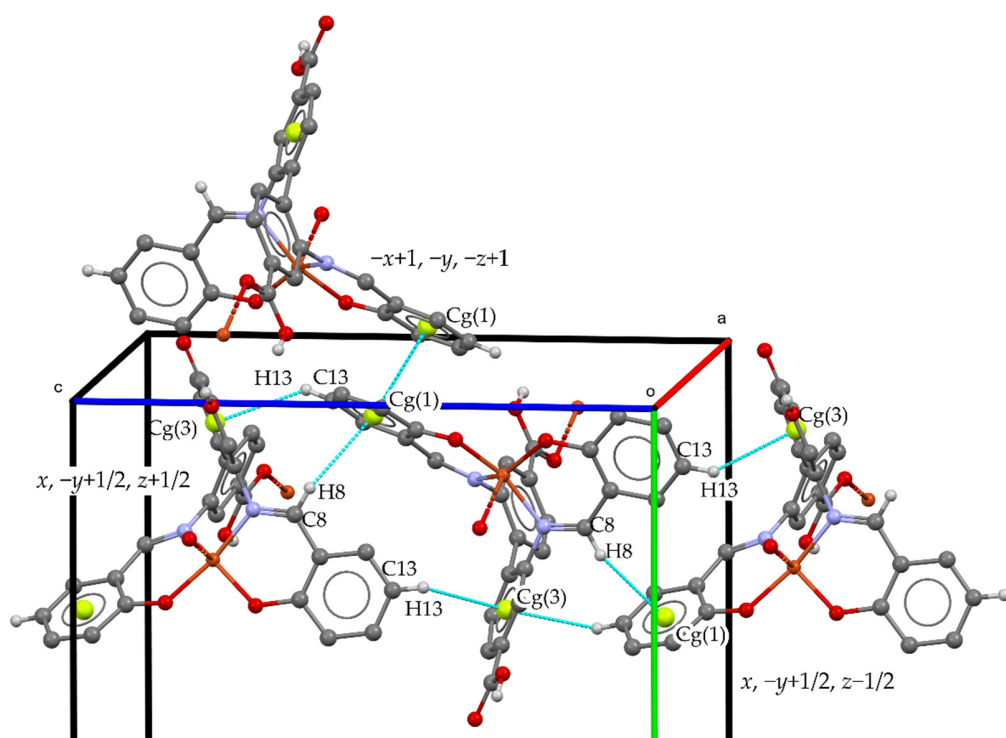

**Figure S7.** Intermolecular  $\pi \cdots \pi$  and C-H $\cdots \pi$  interactions in the crystal structure of **1**. Only relevant hydrogen atoms involved are shown.

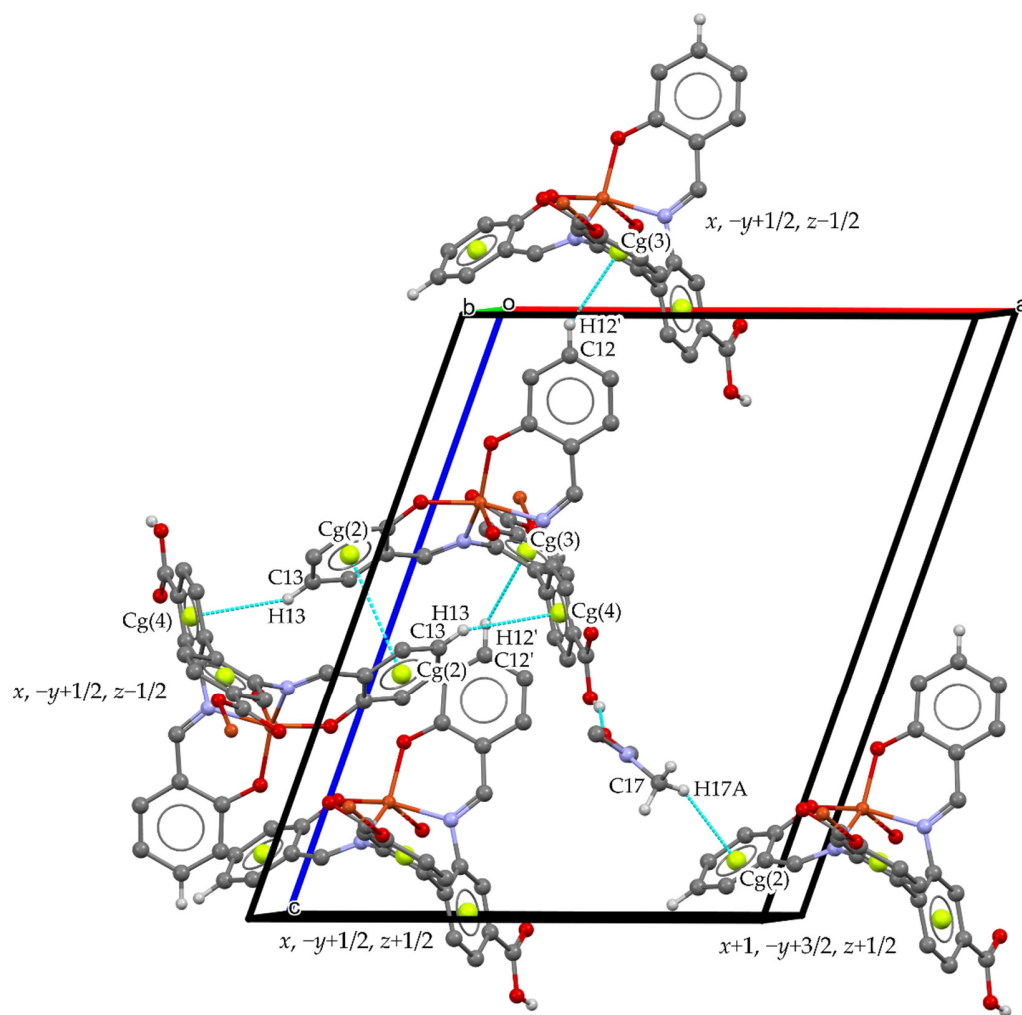

**Figure S8.** Intermolecular  $\pi \cdots \pi$  and C-H $\cdots \pi$  interactions in the crystal structure of **2**. Only relevant hydrogen atoms involved are shown.
